# Supplementary material for: AFM study of cytochrome CYP102A1 oligomeric state
Source: Royal Society of Chemistry journal article supplement (doi:10.1039/c2sm07333a), 2012-01-01
Supplement: c2sm07333a.pdf [file c2sm07333a.pdf]

## Supplementary Information

**Table S1** CYP102A1 diameters in solution and share of objects measured by PCS. The series of 7 measurements was carried out to confirm a stability of the measurements in time. Measurements №1-2 were carried out at the start. Measurements №3-5 were carried out in 1 hour after PCS measurement start. Measurements № 6-7 were carried out in 1.5 hour after PCS measurement start. Experimental conditions: see “PCS measurements” in the main text.

| №  | Diameter, nm | Share of objects, % |
|----|--------------|---------------------|
| 1. | 14.1±5.8     | 98.54               |
| 2. | 16.1±6.4     | 98.45               |
| 3. | 12.1±7.4     | 99.69               |
| 4. | 10.8±7.7     | 99.37               |
| 5. | 11.8±7.4     | 99.1                |
| 6. | 11.3±6.1     | 98.67               |
| 7. | 16.6±7.7     | 99.42               |

**Table S2**  $\chi^2$ -criterion for approximation experimental curves of density of CYP102A1 distribution with heights  $\rho(h)$  by Gaussian.

|                                                                                                   | Experimental conditions/<br>AFM | Approximation by<br>one Gaussian, $\chi^2$ |   | Approximation by<br>double Gaussian, $\chi^2$ |
|---------------------------------------------------------------------------------------------------|---------------------------------|--------------------------------------------|---|-----------------------------------------------|
| Density of<br>CYP102A1<br>distribution with<br>heights $\rho(h)$<br>obtained by standard<br>probe | Buffer/ Dimension 3100          | 0.7                                        | > | 0.2                                           |
|                                                                                                   | Air/ Dimension 3100             | 1.1                                        | > | 0.3                                           |
|                                                                                                   | Air/ NTEGRA Aura                | 2.7                                        | > | 0.7                                           |
|                                                                                                   | Vacuum/ NTEGRA<br>Aura          | 2.0                                        | > | 1.6                                           |
